# Supplementary material for: Utilization of novel systemic therapies for multiple myeloma: A retrospective study of front‐line regimens using the SEER‐Medicare data
Source: PubMed Central journal article supplement (PMC6970041; doi:10.1002/cam4.2698), 2019-12-04
Supplement: CAM4-9-626-s001.pdf [file CAM4-9-626-s001.pdf]

Appendix Table A. Probability of receiving a treatment (Adjusted) by age group

YEAR OF DIAGNOSIS == 2007

|         | Probability | CI 95% LOW | CI 95% HIGH |
|---------|-------------|------------|-------------|
| 66 - 69 | 82%         | 77%        | 87%         |
| 70 - 74 | 78%         | 74%        | 83%         |
| 75 - 79 | 80%         | 76%        | 84%         |
| 80 - 84 | 72%         | 66%        | 78%         |
| 85 +    | 60%         | 53%        | 66%         |

YEAR OF DIAGNOSIS == 2008

|         | Probability | CI 95% LOW | CI 95% HIGH |
|---------|-------------|------------|-------------|
| 66 - 69 | 85%         | 81%        | 90%         |
| 70 - 74 | 82%         | 78%        | 86%         |
| 75 - 79 | 83%         | 79%        | 87%         |
| 80 - 84 | 76%         | 71%        | 81%         |
| 85 +    | 65%         | 58%        | 71%         |

YEAR OF DIAGNOSIS == 2009

|         | Probability | CI 95% LOW | CI 95% HIGH |
|---------|-------------|------------|-------------|
| 66 - 69 | 85%         | 80%        | 89%         |
| 70 - 74 | 81%         | 77%        | 86%         |
| 75 - 79 | 83%         | 79%        | 87%         |
| 80 - 84 | 76%         | 70%        | 81%         |
| 85 +    | 64%         | 57%        | 70%         |

YEAR OF DIAGNOSIS == 2010

|         | Probability | CI 95% LOW | CI 95% HIGH |
|---------|-------------|------------|-------------|
| 66 - 69 | 85%         | 81%        | 89%         |
| 70 - 74 | 82%         | 78%        | 86%         |
| 75 - 79 | 83%         | 80%        | 87%         |
| 80 - 84 | 76%         | 71%        | 81%         |
| 85 +    | 65%         | 59%        | 71%         |

YEAR OF DIAGNOSIS == 2011

|         | Probability | CI 95% LOW | CI 95% HIGH |
|---------|-------------|------------|-------------|
| 66 - 69 | 86%         | 81%        | 90%         |
| 70 - 74 | 83%         | 79%        | 87%         |
| 75 - 79 | 84%         | 80%        | 88%         |
| 80 - 84 | 77%         | 72%        | 82%         |
| 85 +    | 65%         | 59%        | 71%         |

Appendix Table B. Treatment Choice (Adjusted) by age group

YEAR OF DIAGNOSIS = 2007

REGIMEN = PI\_ALKAY

```

-----
Probability CI 95% LOW CI 95% HIGH
66 - 69      15%      10%      21%
70 - 74      10%       6%      14%
75 - 79       8%       5%      11%
80 - 84       6%       3%       9%
85 +         5%       2%       8%
-----

```

YEAR OF DIAGNOSIS = 2007

REGIMEN = PI\_IMIDS

```

-----
Probability CI 95% LOW CI 95% HIGH
66 - 69       3%       1%       5%
70 - 74       3%       1%       5%
75 - 79       5%       2%       7%
80 - 84       2%       1%       4%
85 +         2%       1%       4%
-----

```

YEAR OF DIAGNOSIS = 2007

REGIMEN = PI

```

-----
Probability CI 95% LOW CI 95% HIGH
66 - 69      16%      11%      22%
70 - 74      16%      11%      21%
75 - 79      16%      11%      21%
80 - 84      17%      12%      22%
85 +        14%       9%      19%
-----

```

YEAR OF DIAGNOSIS = 2007

REGIMEN = IMID

```

-----
Probability CI 95% LOW CI 95% HIGH
66 - 69      33%      25%      40%
70 - 74      37%      31%      44%
75 - 79      31%      25%      37%
80 - 84      34%      27%      41%
85 +        32%      24%      39%
-----

```

YEAR OF DIAGNOSIS = 2007

REGIMEN = IMIDS\_ALKAY

```

-----
Probability CI 95% LOW CI 95% HIGH
66 - 69       7%       3%      11%
70 - 74       9%       5%      13%
75 - 79       8%       4%      11%
80 - 84      12%       7%      18%
85 +         9%       4%      14%
-----

```

Appendix Table B. Treatment Choice (Adjusted) by age group

YEAR OF DIAGNOSIS = 2008  
 REGIMEN = PI\_ALKAY

|         | Probability | CI 95% LOW | CI 95% HIGH |
|---------|-------------|------------|-------------|
| 66 - 69 | 19%         | 13%        | 25%         |
| 70 - 74 | 13%         | 9%         | 17%         |
| 75 - 79 | 10%         | 7%         | 14%         |
| 80 - 84 | 8%          | 5%         | 12%         |
| 85 +    | 7%          | 3%         | 10%         |

YEAR OF DIAGNOSIS = 2008  
 REGIMEN = PI\_IMIDS

|         | Probability | CI 95% LOW | CI 95% HIGH |
|---------|-------------|------------|-------------|
| 66 - 69 | 6%          | 3%         | 9%          |
| 70 - 74 | 7%          | 4%         | 10%         |
| 75 - 79 | 10%         | 5%         | 14%         |
| 80 - 84 | 5%          | 2%         | 8%          |
| 85 +    | 5%          | 2%         | 8%          |

YEAR OF DIAGNOSIS = 2008  
 REGIMEN = PI

|         | Probability | CI 95% LOW | CI 95% HIGH |
|---------|-------------|------------|-------------|
| 66 - 69 | 18%         | 12%        | 23%         |
| 70 - 74 | 18%         | 13%        | 23%         |
| 75 - 79 | 18%         | 13%        | 23%         |
| 80 - 84 | 20%         | 14%        | 25%         |
| 85 +    | 17%         | 11%        | 23%         |

YEAR OF DIAGNOSIS = 2008  
 REGIMEN = IMID

|         | Probability | CI 95% LOW | CI 95% HIGH |
|---------|-------------|------------|-------------|
| 66 - 69 | 27%         | 20%        | 33%         |
| 70 - 74 | 32%         | 26%        | 37%         |
| 75 - 79 | 27%         | 21%        | 32%         |
| 80 - 84 | 30%         | 24%        | 37%         |
| 85 +    | 29%         | 22%        | 36%         |

YEAR OF DIAGNOSIS = 2008  
 REGIMEN = IMIDS\_ALKAY

|         | Probability | CI 95% LOW | CI 95% HIGH |
|---------|-------------|------------|-------------|
| 66 - 69 | 6%          | 3%         | 10%         |
| 70 - 74 | 9%          | 6%         | 13%         |
| 75 - 79 | 8%          | 4%         | 11%         |
| 80 - 84 | 13%         | 8%         | 18%         |
| 85 +    | 9%          | 4%         | 15%         |

Appendix Table B. Treatment Choice (Adjusted) by age group

YEAR OF DIAGNOSIS = 2009  
 REGIMEN = PI\_ALKAY

|         | Probability | CI 95% LOW | CI 95% HIGH |
|---------|-------------|------------|-------------|
| 66 - 69 | 17%         | 11%        | 23%         |
| 70 - 74 | 12%         | 8%         | 16%         |
| 75 - 79 | 9%          | 6%         | 13%         |
| 80 - 84 | 8%          | 5%         | 11%         |
| 85 +    | 7%          | 3%         | 10%         |

YEAR OF DIAGNOSIS = 2009  
 REGIMEN = PI\_IMIDS

|         | Probability | CI 95% LOW | CI 95% HIGH |
|---------|-------------|------------|-------------|
| 66 - 69 | 8%          | 4%         | 11%         |
| 70 - 74 | 8%          | 5%         | 12%         |
| 75 - 79 | 12%         | 8%         | 17%         |
| 80 - 84 | 7%          | 4%         | 10%         |
| 85 +    | 7%          | 3%         | 11%         |

YEAR OF DIAGNOSIS = 2009  
 REGIMEN = PI

|         | Probability | CI 95% LOW | CI 95% HIGH |
|---------|-------------|------------|-------------|
| 66 - 69 | 22%         | 16%        | 29%         |
| 70 - 74 | 23%         | 18%        | 29%         |
| 75 - 79 | 23%         | 18%        | 28%         |
| 80 - 84 | 26%         | 20%        | 32%         |
| 85 +    | 23%         | 16%        | 30%         |

YEAR OF DIAGNOSIS = 2009  
 REGIMEN = IMID

|         | Probability | CI 95% LOW | CI 95% HIGH |
|---------|-------------|------------|-------------|
| 66 - 69 | 26%         | 20%        | 33%         |
| 70 - 74 | 32%         | 26%        | 38%         |
| 75 - 79 | 27%         | 21%        | 32%         |
| 80 - 84 | 32%         | 25%        | 38%         |
| 85 +    | 31%         | 24%        | 38%         |

YEAR OF DIAGNOSIS = 2009  
 REGIMEN = IMIDS\_ALKAY

|         | Probability | CI 95% LOW | CI 95% HIGH |
|---------|-------------|------------|-------------|
| 66 - 69 | 3%          | 1%         | 5%          |
| 70 - 74 | 5%          | 2%         | 7%          |
| 75 - 79 | 4%          | 2%         | 6%          |
| 80 - 84 | 7%          | 3%         | 10%         |
| 85 +    | 5%          | 2%         | 8%          |

Appendix Table B. Treatment Choice (Adjusted) by age group

YEAR OF DIAGNOSIS = 2010  
 REGIMEN = PI\_ALKAY

```

-----
Probability CI 95% LOW CI 95% HIGH
66 - 69      24%      18%      31%
70 - 74      17%      13%      22%
75 - 79      14%      10%      18%
80 - 84      12%       8%      16%
85 +         10%       6%      15%
-----
  
```

YEAR OF DIAGNOSIS = 2010  
 REGIMEN = PI\_IMIDS

```

-----
Probability CI 95% LOW CI 95% HIGH
66 - 69       9%       5%      13%
70 - 74      10%       6%      14%
75 - 79      15%      10%      20%
80 - 84       8%       5%      12%
85 +          9%       4%      14%
-----
  
```

YEAR OF DIAGNOSIS = 2010  
 REGIMEN = PI

```

-----
Probability CI 95% LOW CI 95% HIGH
66 - 69      20%      14%      25%
70 - 74      21%      16%      26%
75 - 79      21%      16%      26%
80 - 84      24%      18%      30%
85 +         22%      15%      28%
-----
  
```

YEAR OF DIAGNOSIS = 2010  
 REGIMEN = IMID

```

-----
Probability CI 95% LOW CI 95% HIGH
66 - 69      26%      20%      32%
70 - 74      32%      26%      37%
75 - 79      27%      22%      33%
80 - 84      33%      26%      39%
85 +         32%      25%      40%
-----
  
```

YEAR OF DIAGNOSIS = 2010  
 REGIMEN = IMIDS\_ALKAY

```

-----
Probability CI 95% LOW CI 95% HIGH
66 - 69       4%       1%       6%
70 - 74       6%       3%       8%
75 - 79       5%       2%       7%
80 - 84       9%       5%      12%
85 +          7%       3%      10%
-----
  
```

Appendix Table B. Treatment Choice (Adjusted) by age group

YEAR OF DIAGNOSIS = 2011  
 REGIMEN = PI\_ALKAY

|         | Probability | CI 95% LOW | CI 95% HIGH |
|---------|-------------|------------|-------------|
| 66 - 69 | 32%         | 25%        | 40%         |
| 70 - 74 | 24%         | 18%        | 30%         |
| 75 - 79 | 19%         | 14%        | 24%         |
| 80 - 84 | 17%         | 11%        | 22%         |
| 85 +    | 14%         | 9%         | 20%         |

YEAR OF DIAGNOSIS = 2011  
 REGIMEN = PI\_IMIDS

|         | Probability | CI 95% LOW | CI 95% HIGH |
|---------|-------------|------------|-------------|
| 66 - 69 | 9%          | 5%         | 13%         |
| 70 - 74 | 10%         | 6%         | 14%         |
| 75 - 79 | 15%         | 10%        | 20%         |
| 80 - 84 | 9%          | 5%         | 12%         |
| 85 +    | 9%          | 5%         | 14%         |

YEAR OF DIAGNOSIS = 2011  
 REGIMEN = PI

|         | Probability | CI 95% LOW | CI 95% HIGH |
|---------|-------------|------------|-------------|
| 66 - 69 | 20%         | 14%        | 26%         |
| 70 - 74 | 22%         | 17%        | 27%         |
| 75 - 79 | 22%         | 17%        | 27%         |
| 80 - 84 | 26%         | 20%        | 32%         |
| 85 +    | 23%         | 16%        | 29%         |

YEAR OF DIAGNOSIS = 2011  
 REGIMEN = IMID

|         | Probability | CI 95% LOW | CI 95% HIGH |
|---------|-------------|------------|-------------|
| 66 - 69 | 20%         | 15%        | 25%         |
| 70 - 74 | 26%         | 20%        | 31%         |
| 75 - 79 | 22%         | 17%        | 27%         |
| 80 - 84 | 27%         | 21%        | 33%         |
| 85 +    | 26%         | 20%        | 33%         |

YEAR OF DIAGNOSIS = 2011  
 REGIMEN = IMIDS\_ALKAY

|         | Probability | CI 95% LOW | CI 95% HIGH |
|---------|-------------|------------|-------------|
| 66 - 69 | 2%          | 1%         | 3%          |
| 70 - 74 | 3%          | 1%         | 5%          |
| 75 - 79 | 3%          | 1%         | 4%          |
| 80 - 84 | 5%          | 2%         | 8%          |
| 85 +    | 4%          | 1%         | 6%          |
