# Supplementary material for: Utilization of novel systemic therapies for multiple myeloma: A retrospective study of front‐line regimens using the SEER‐Medicare data
Source: PubMed Central journal article supplement (PMC6970041; doi:10.1002/cam4.2698), 2019-12-04

Appendix Figure A: Adjusted Probabilities of Receiving Treatment with confidence intervals (Diagnosis Years = 2008 – 2010)

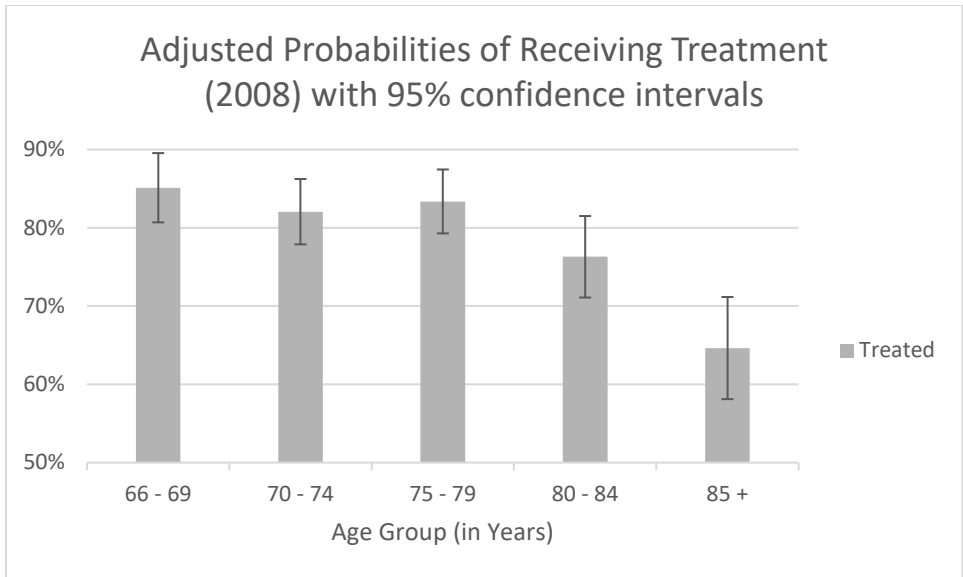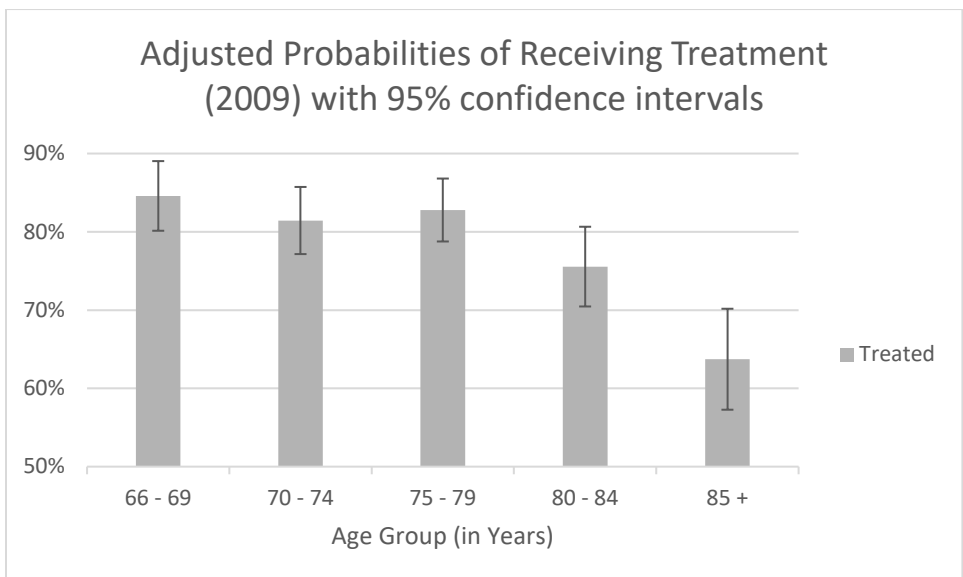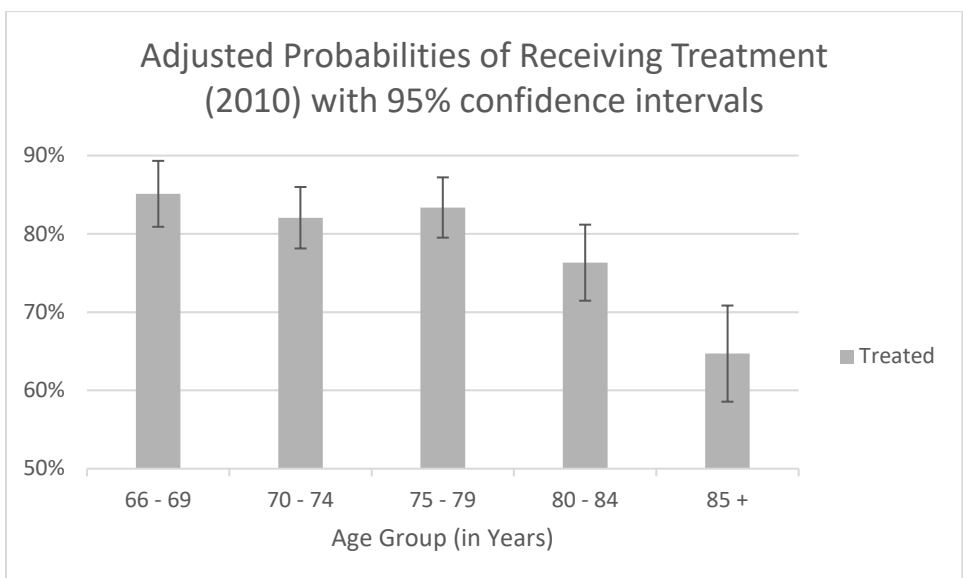

Supplement: CAM4-9-626-s003.pdf [file CAM4-9-626-s003.pdf]
